# Supplementary material for: Effect of particle sizes and mass ratios of a phosphor on light color performance of a green phosphor thin film and a laminated white light-emitting diode
Source: Royal Society of Chemistry journal article supplement (doi:10.1039/c9ra05503g), 2019-01-01
Supplement: c9ra05503g1.pdf [file c9ra05503g1.pdf]

## Supplementary Information

A manuscript submitted to RSC Advances

### Particle sizes and mass ratios of phosphor on light color performance of green phosphor thin film and laminated white light emitting diode

Ningze Zhuo,<sup>a,b,c</sup> Na Zhang,<sup>b,c</sup> Teng Jiang,<sup>d</sup> Peng Chen,<sup>a\*</sup> Haibo Wang,<sup>b,c\*</sup>

---

*a. School of Electronic Science and Engineering, Nanjing University, Nanjing 210093, China.*

*b. Institute of Optoelectronic Materials of Light Industry, Nanjing 210015, China.*

*c. Research Institute of Electric Light Source Materials, Nanjing Tech University, Nanjing 210015, China.*

*d. College of Materials Science and Engineering, Nanjing Tech University, Nanjing 210015, China.*

\*Corresponding Author: Peng Chen and Haibo Wang (pchen@nju.edu.cn, wanghaibo88@163.com)

**\*Corresponding author:**

**Peng Chen**

**School of Electronic Science and Engineering**

**Nanjing University**

**Nanjing 210093, China**

**E-Mail: [pchen@nju.edu.cn](mailto:pchen@nju.edu.cn)**

**Haibo Wang**

**Research Institute of Electric Light Source Materials**

**Institute of Optoelectronic Materials of Light Industry**

**Nanjing TECH University**

**Nanjing 210093, China**

**E-Mail: [wanghaibo88@163.com](mailto:wanghaibo88@163.com)**

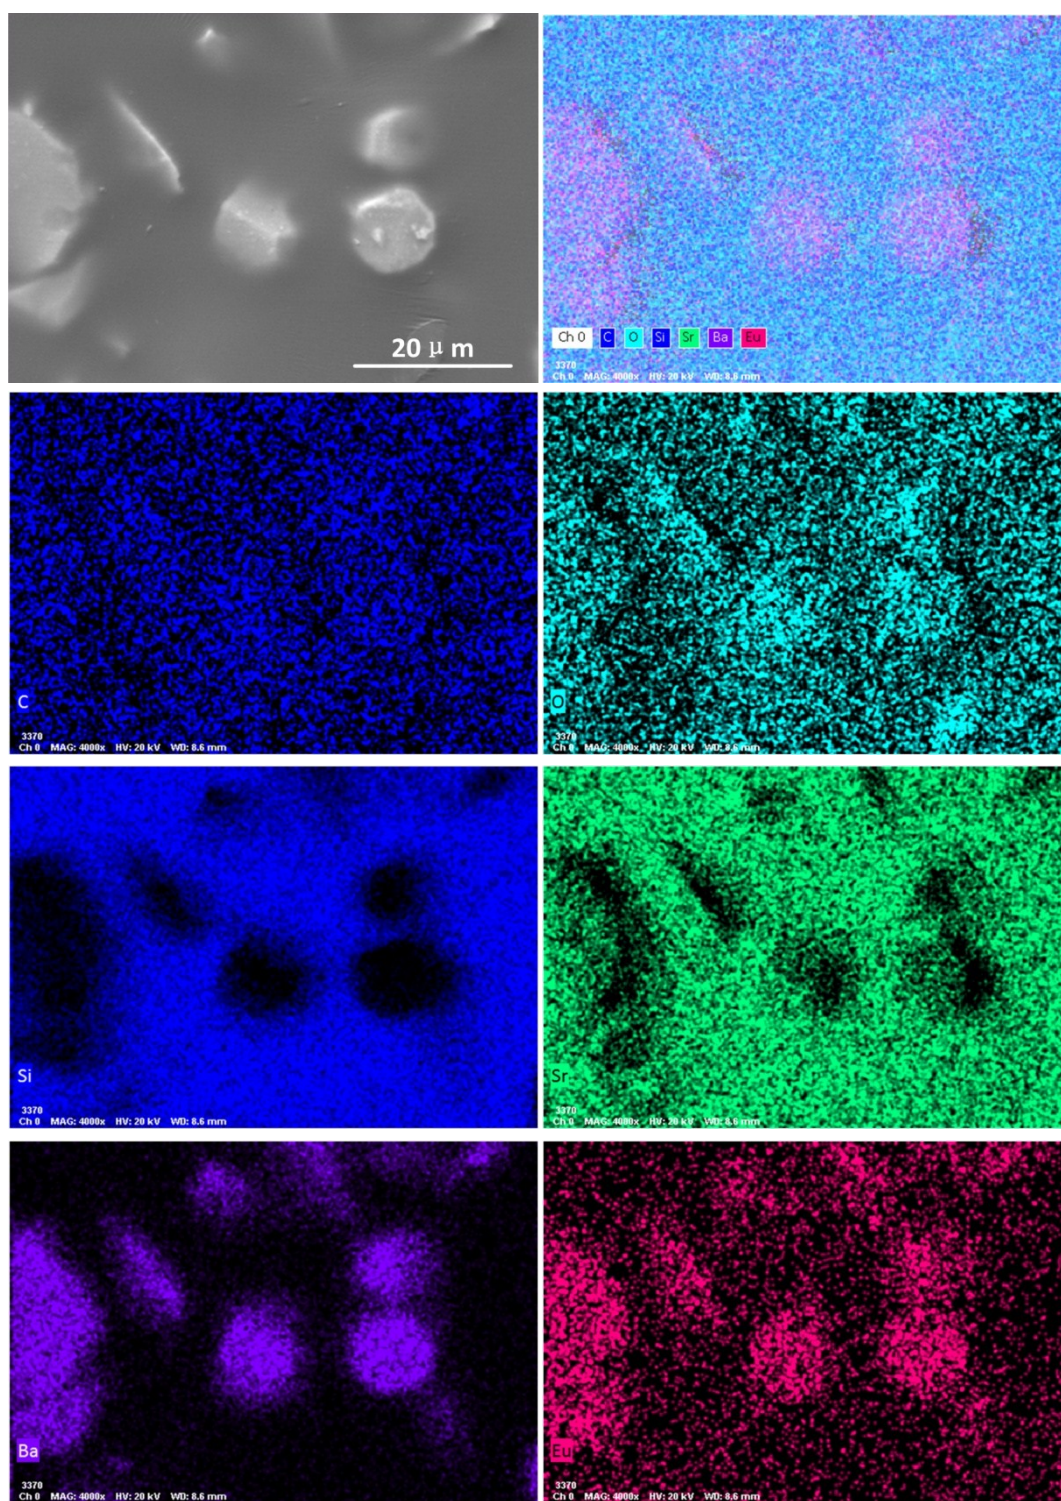

Figure.S1 EDS mapping of all the elements in the green PTF

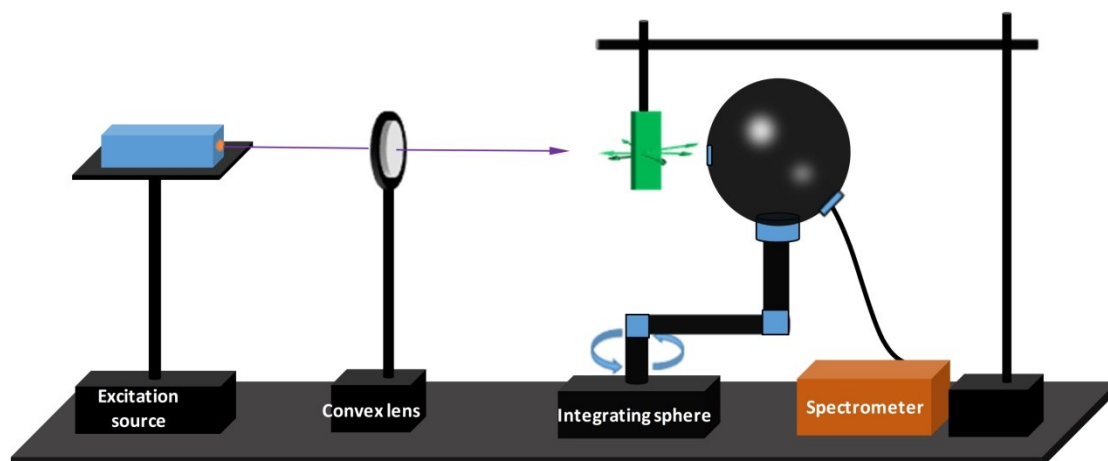

Figure.S2 Schematic diagram of light distribution tester

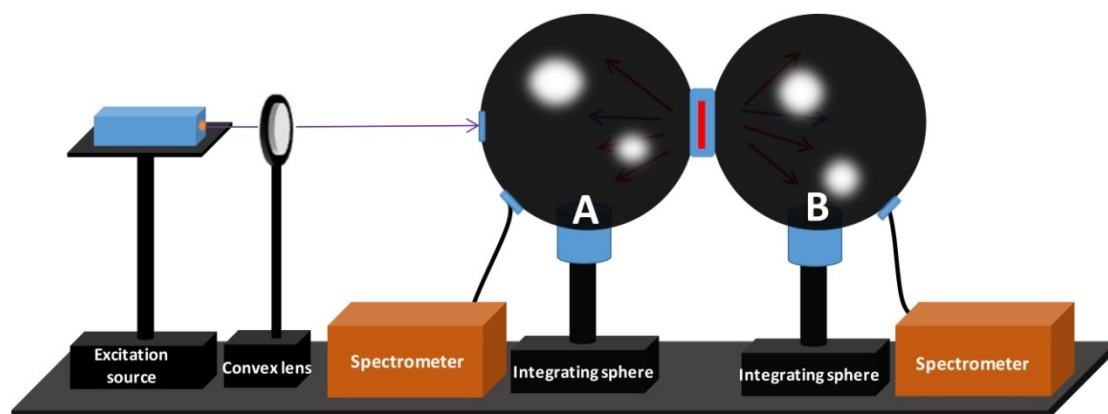

Figure.S3 Schematic diagram of double integrating sphere
